# Supplementary material for: A genetic link between discriminative fear coding by the lateral amygdala, dopamine, and fear generalization
Source: eLife journal article supplement (doi:10.7554/elife.08969), 2015-09-24
Supplement: supp [file elife-08969-supp-v1.zip]

**Figure 4 Supplement 2**

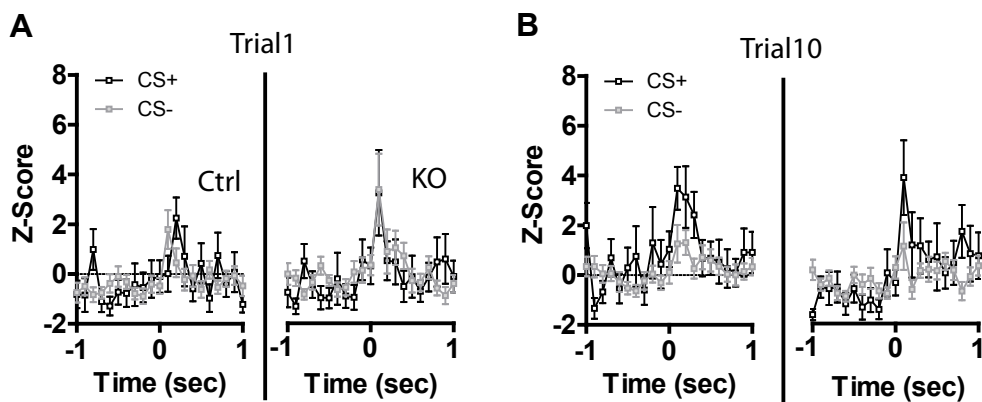

**Figure 4 Supplement 2 CS activated LA neurons are not different at the start of conditioning.** (A) Average normalized firing rate of CS+ and CS- activated neurons in Ctrl and KO mice during trial 1 of the first day of conditioning. (B) Average normalized firing rate of CS+ and CS- activated neurons in Ctrl and KO mice during trial 10 of the first day of conditioning.
