# Supplementary material for: A genetic link between discriminative fear coding by the lateral amygdala, dopamine, and fear generalization
Source: eLife journal article supplement (doi:10.7554/elife.08969), 2015-09-24
Supplement: supp [file elife-08969-supp-v1.zip]

**Figure 4 Supplement 1**

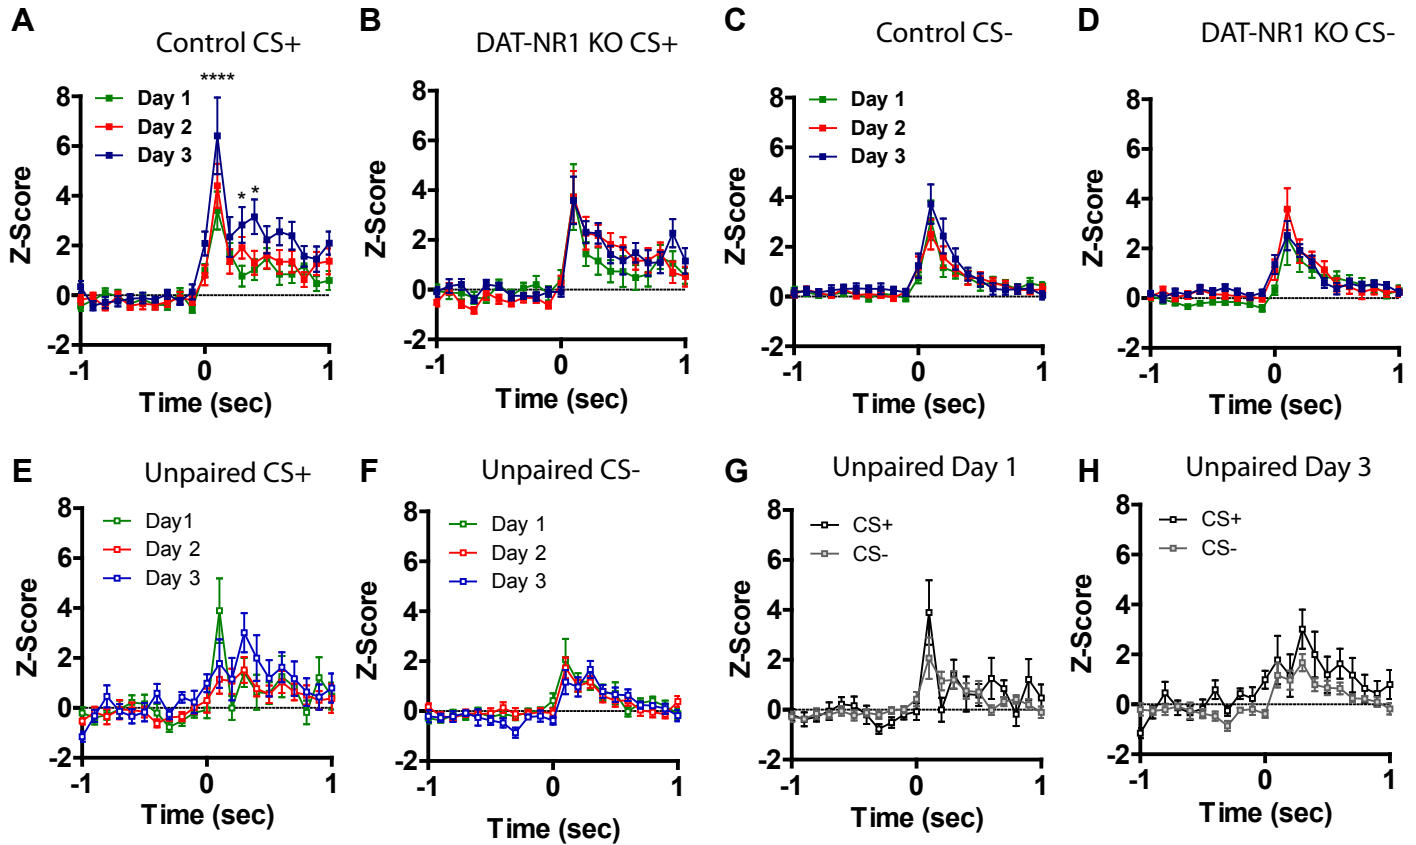

**Figure 4 Supplement 1. Plasticity in CS activated LA neurons is absent in DAT-NR1 KO**

**mice.** (A) Average normalized firing rate of CS+ activated neurons in control mice across days of conditioning. (B) Average normalized firing rate of CS+ activated neurons in in DAT-NR1 KO mice across days of conditioning. (C) Average normalized firing rate of CS- activated neurons in control mice across days of conditioning. (D) Average normalized firing rate of CS- activated neurons in in DAT-NR1 KO mice across days of conditioning. (E) Average normalized firing rate of activated neurons during presentation of unpaired CS+ in control mice across days of conditioning. (F) Average normalized firing rate of activated neurons during presentation of unpaired CS- in control mice across days of conditioning. (G) Average normalized firing rate of CS+ and CS- activated neurons in unpaired Ctrl mice on day 1 of conditioning. (H) Average normalized firing rate of CS+ and CS- activated neurons in unpaired Ctrl mice on day 3 of conditioning. Data are presented as the mean ± S.E.M. Repeated measures ANOVA, \*\*\*\* $P < 0.0001$ , Bonferroni post-test.
