# Supplementary material for: A genetic link between discriminative fear coding by the lateral amygdala, dopamine, and fear generalization
Source: eLife journal article supplement (doi:10.7554/elife.08969), 2015-09-24
Supplement: supp [file elife-08969-supp-v1.zip]

## Figure 3 Supplement

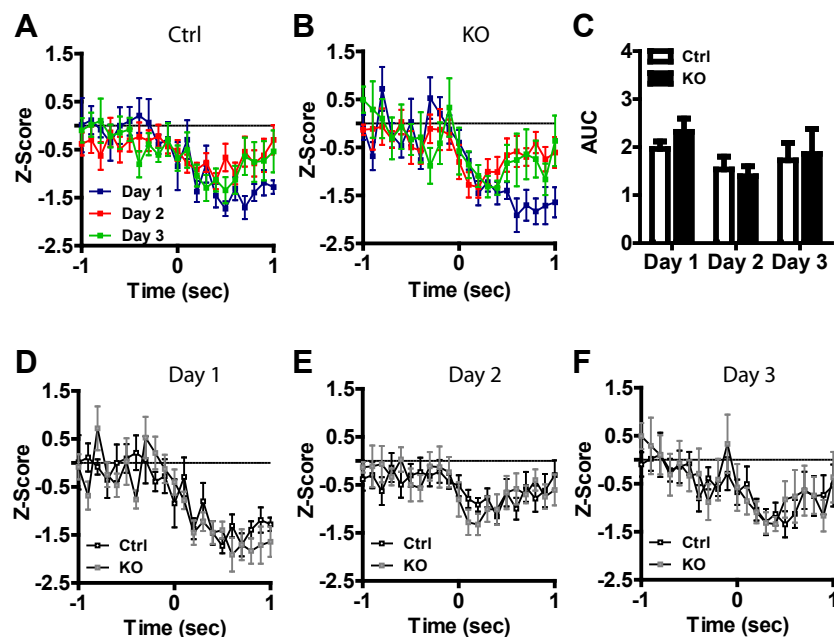

### Figure 3 Supplement. US-inhibited LA neurons do not change across days of conditioning.

(A) Average normalized firing rate of US-inhibited neurons in control mice across days of conditioning (Control: n=8, 16, and 14 Days 1-3, respectively; DAT-NR1 KO: n=8, 8, and 9 Days 1-3, respectively). (B) Average normalized firing rate of US-inhibited neurons in DAT-NR1 KO mice across days of conditioning. (C) Average area under the curve (AUC) of inhibited response for control and DAT-NR1 KO mice across days. (D-F) Comparison of inhibited responses of control and DAT-NR1 KO mice during day 1 (D), day 2 (E), and day 3 of conditioning (F). Data are presented as the mean  $\pm$  S.E.M.
