# Supplementary material for: A genetic link between discriminative fear coding by the lateral amygdala, dopamine, and fear generalization
Source: eLife journal article supplement (doi:10.7554/elife.08969), 2015-09-24
Supplement: supp [file elife-08969-supp-v1.zip]

Archive with 8 entries (8 files):
- elife_poa_e08969_Figure_4_figure_supplement_1.pdf
- elife_poa_e08969_Figure_4_figure_supplement_2.pdf
- elife_poa_e08969_Figure_2_figure_supplement_1.pdf
- elife_poa_e08969_Figure_4_figure_supplement_3.pdf
- elife_poa_e08969_Figure_5_figure_supplement_1.pdf
- elife_poa_e08969_Supplementary_File_1.docx
- elife_poa_e08969_Figure_3_figure_supplement_1.pdf
- elife_poa_e08969_Figure_6_figure_supplement_1.pdf
