# Supplementary material for: A genetic link between discriminative fear coding by the lateral amygdala, dopamine, and fear generalization
Source: eLife journal article supplement (doi:10.7554/elife.08969), 2015-09-24
Supplement: supp [file elife-08969-supp-v1.zip]

## Figure 5 Supplement

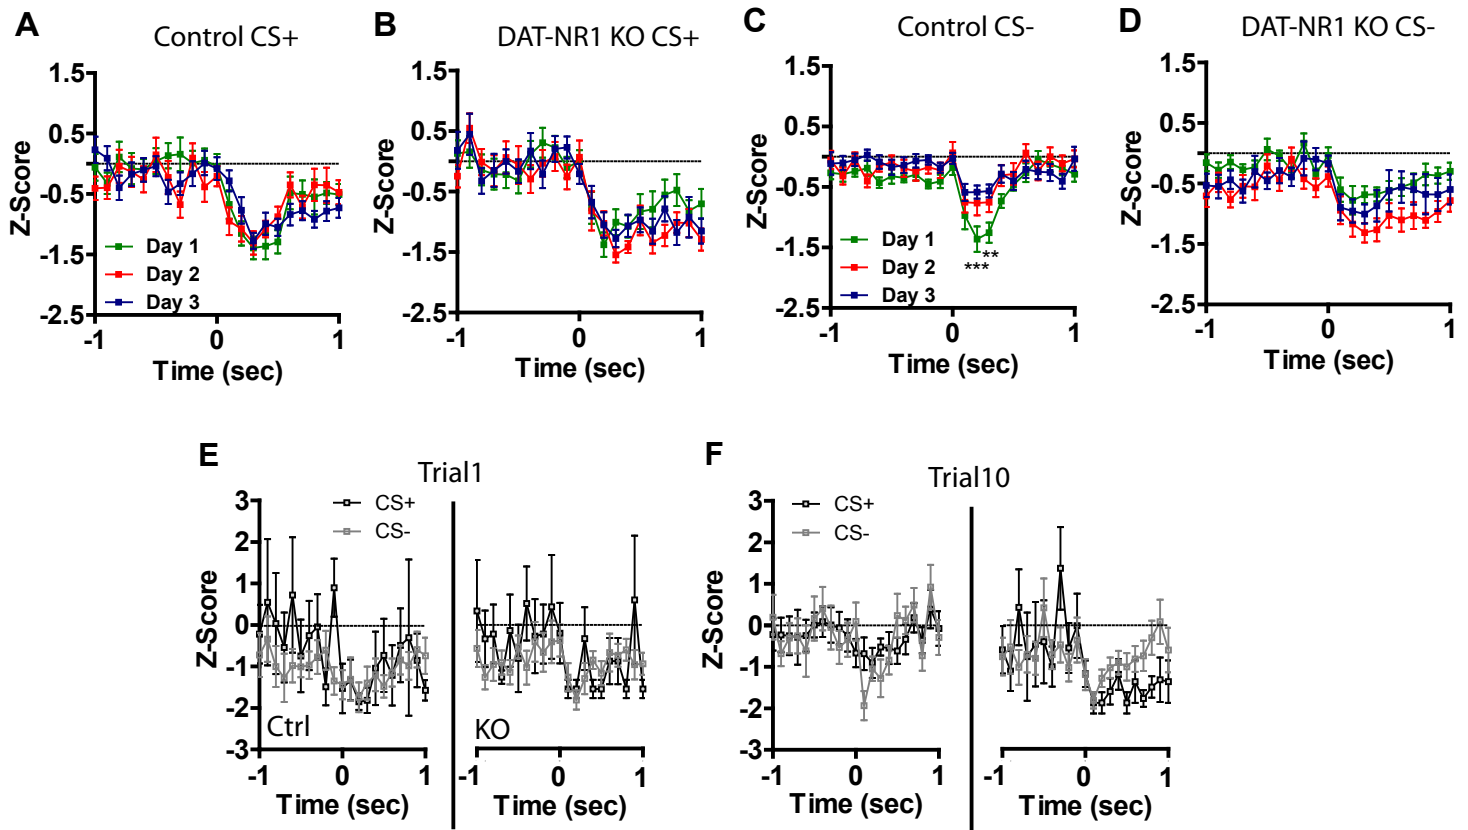

### Figure 5 Supplement. Plasticity in CS inhibited LA neurons is absent in DAT-NR1 KO

**mice.** (A) Average normalized firing rate of CS+ inhibited neurons in control mice across days of conditioning. (B) Average normalized firing rate of CS+ inhibited neurons in in DAT-NR1 KO mice across days of conditioning. (C) Average normalized firing rate of CS- inhibited neurons in control mice across days of conditioning. (D) Average normalized firing rate of CS- inhibited neurons in in DAT-NR1 KO mice across days of conditioning. (E) Average normalized firing rate of CS+ and CS- inhibited neurons in Ctrl and KO mice during trial 1 of the first day of conditioning. (F) Average normalized firing rate of CS+ and CS- inhibited neurons in Ctrl and KO mice during trial 10 of the first day of conditioning. Data are presented as the mean  $\pm$  S.E.M. Repeated measures ANOVA, \*\*  $P < 0.01$  and ,\*\*\*  $P < 0.001$ , Bonferroni post-test.
