# Supplementary material for: A genetic link between discriminative fear coding by the lateral amygdala, dopamine, and fear generalization
Source: eLife journal article supplement (doi:10.7554/elife.08969), 2015-09-24
Supplement: supp [file elife-08969-supp-v1.zip › elife_poa_e08969_Figure_2_figure_supplement_1.pdf]

## Figure 2 Supplement

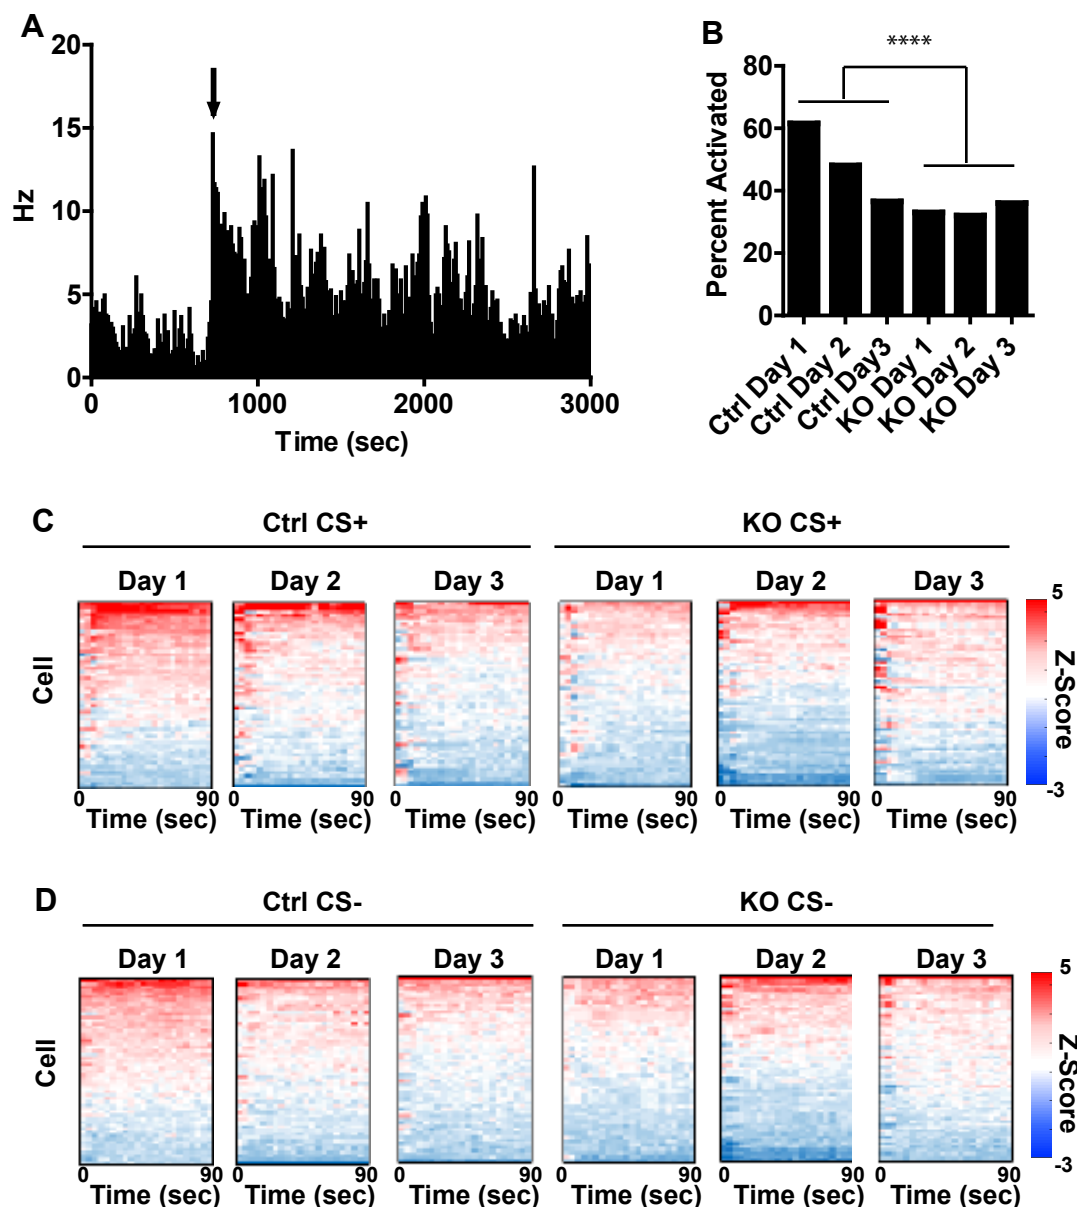

**Figure 2 Supplement. Population activity during fear conditioning.** (A) Histogram of firing rate of an example neuron on day one of fear conditioning illustrating increased activity following presentation of the US. Arrow indicates onset of first footshock. (B) Proportion of activated neurons is highest in control mice on day 1 and decreases with subsequent conditioning.  $P < 0.001$ , *Chi-square*. (C-D) Heat plots of normalized firing rate for individual cells in control and DAT-NR1 KO mice during CS+/US (C) and CS- (D) presentation and subsequent ITI.
