# Supplementary material for: A genetic link between discriminative fear coding by the lateral amygdala, dopamine, and fear generalization
Source: eLife journal article supplement (doi:10.7554/elife.08969), 2015-09-24
Supplement: supp [file elife-08969-supp-v1.zip › elife_poa_e08969_Figure_4_figure_supplement_3.pdf]

**Figure 4 Supplement 3**

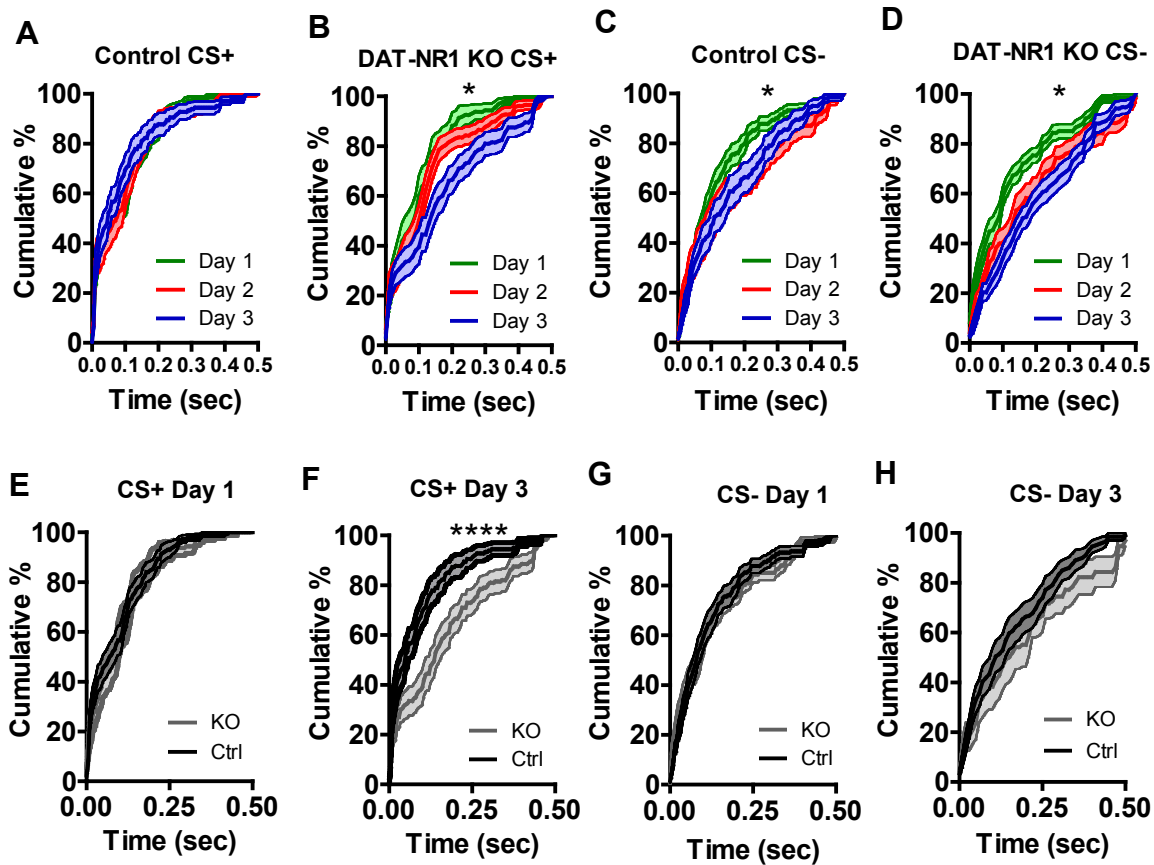

**Figure 4 Supplement 3. Differential response latencies in CS activated neurons between control and DAT-NR1 KO mice.** **(A)** Average cumulative distribution of latency to increase activity in response to CS+ presentation in control mice does not change across days. **(B)** Average cumulative distribution of latency to increase activity in response to CS+ presentation in DAT-NR1 KO mice decrease across days. **(C)** Average cumulative distribution of latency to increase activity in response to CS- presentation in control mice decrease across days. **(D)** Average cumulative distribution of latency to increase activity in response to CS- presentation in DAT-NR1 KO mice decrease across days. **(E)** Average cumulative distribution of latency to increase activity in response to CS+ presentation in control versus DAT-NR1 KO mice on day 1. **(F)** Average cumulative distribution of latency to increase activity in response to CS+ presentation in control versus DAT-NR1 KO mice on day 3. **(G)** Average cumulative distribution of latency to increase activity in response to CS- presentation in control versus DAT-NR1 KO mice on day 1. **(H)** Average cumulative distribution of latency to increase activity in response to CS- presentation in control versus DAT-NR1 KO mice on day 3. Average normalized firing rate of CS+ and CS- activated neurons in unpaired Ctrl mice on day 3 of conditioning. Data are presented as the mean  $\pm$  S.E.M. Repeated measures ANOVA, \* $P < 0.05$ , \*\*\*\*  $P < 0.0001$ , Bonferroni post-test.
