# Supplementary material for: A genetic link between discriminative fear coding by the lateral amygdala, dopamine, and fear generalization
Source: eLife journal article supplement (doi:10.7554/elife.08969), 2015-09-24
Supplement: supp [file elife-08969-supp-v1.zip › elife_poa_e08969_Figure_6_figure_supplement_1.pdf]

## Figure 6 Supplement

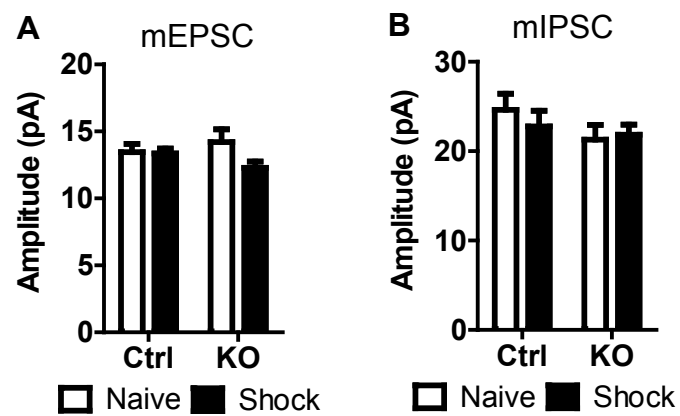

### Figure 6 Supplement. mEPSC and mIPSC amplitude does not change in LA neurons

**following fear conditioning.** (A) Average amplitude of mEPSCs in naïve and fear conditioned (shock) control and DAT-NR1 KO mice. (B) Average amplitude of mIPSCs in naïve and fear conditioned (shock) control and DAT-NR1 KO mice.
